# Supplementary material for: Hypothalamic atrophy and structural covariance in amnestic mild cognitive impairment and Alzheimer’s dementia
Source: PubMed Central journal article supplement — Neuroimage Clin. 2024 Oct 11;44:103687. doi: 10.1016/j.nicl.2024.103687 (PMC11525751; doi:10.1016/j.nicl.2024.103687), 2024-10-11
Supplement: mmc1.pdf [file mmc1.pdf]

---

## Table of Contents

|                                                         |    |
|---------------------------------------------------------|----|
| .....                                                   | 1  |
| SBM ICA Parameters .....                                | 1  |
| ICASSO Plots .....                                      | 2  |
| SBM components .....                                    | 2  |
| PCA components variance summary .....                   | 18 |
| ICA components variance summary .....                   | 19 |
| Kurtosis of loading coefficients and spatial maps ..... | 19 |
| FNC correlations of subject loadings .....              | 21 |
| FNC metrics of component spatial maps .....             | 22 |

## SBM ICA Parameters

.....

*Number of Independent Components : 17*

*ICA Algorithm : Infomax*

*Number Of Subjects : 175*

*Mask File : Default Mask Created From Structural Data*

*PCA Type : Standard*

*Scaling Components : Z-scores*

*Stability analysis type : none*

*Anatomical file: /Users/christopherweise/Desktop/gift-master/GroupICAT/icatb/  
icatb\_templates/ch2bet\_3x3x3.nii*

*Slice Plane: Axial*

*Image values: Positive and negative*

*Convert to Z-scores: yes*

*Threshold: 2*

.....

---

# ICASSO Plots

## SBM components

Group spatial maps and subject loading coefficients

- a) Subject loading coefficients
- b) Group spatial maps

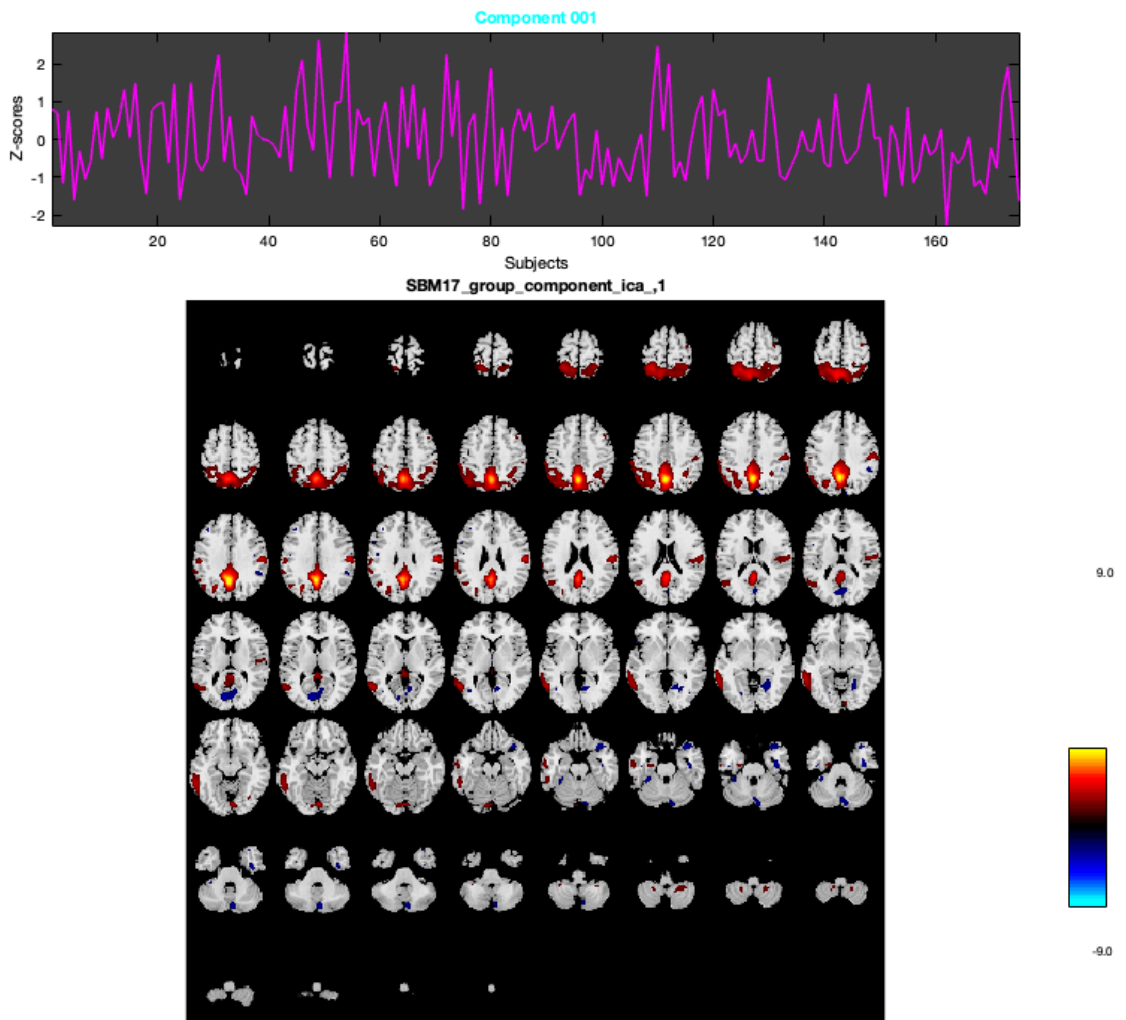

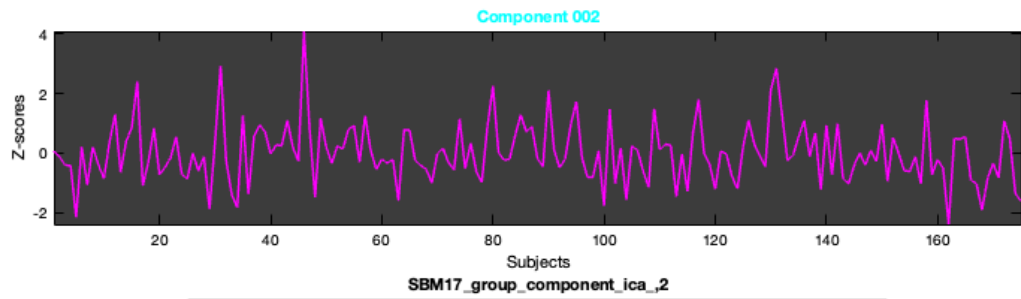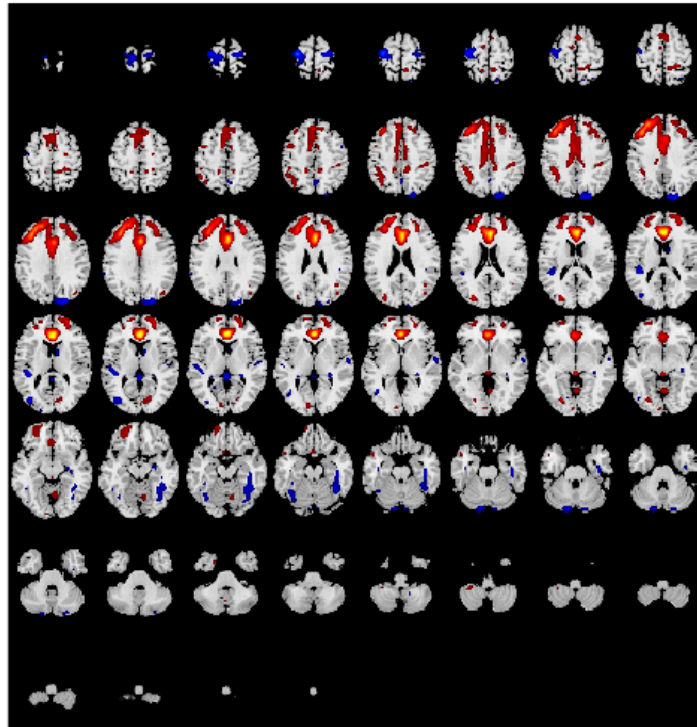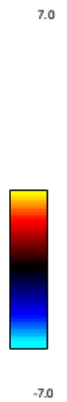

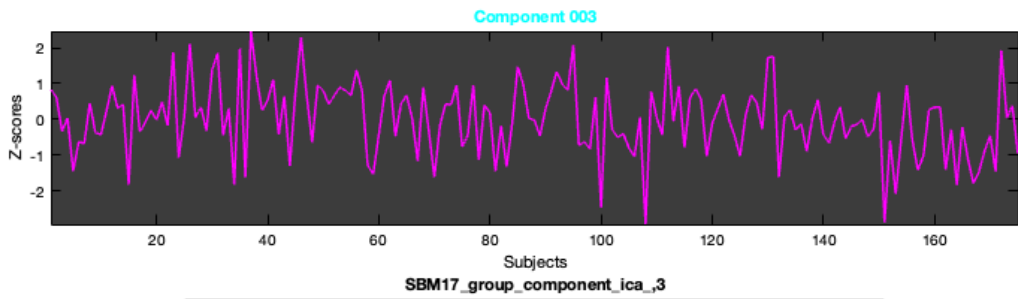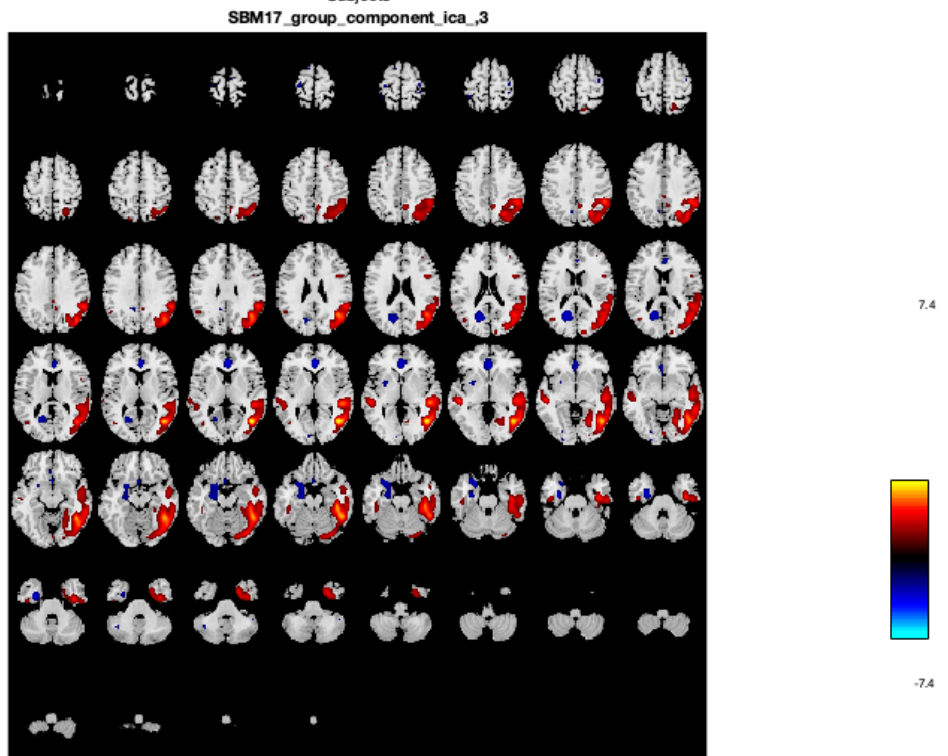

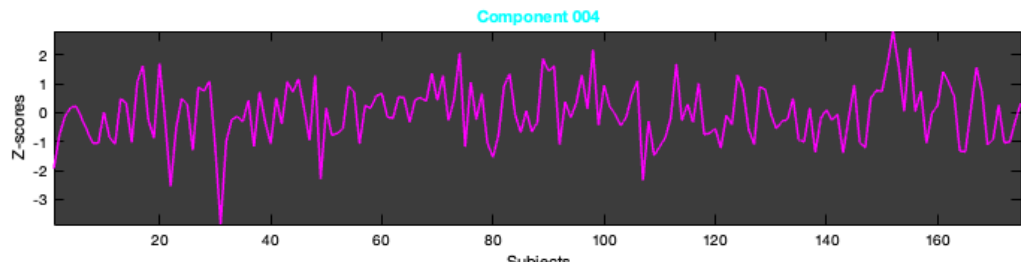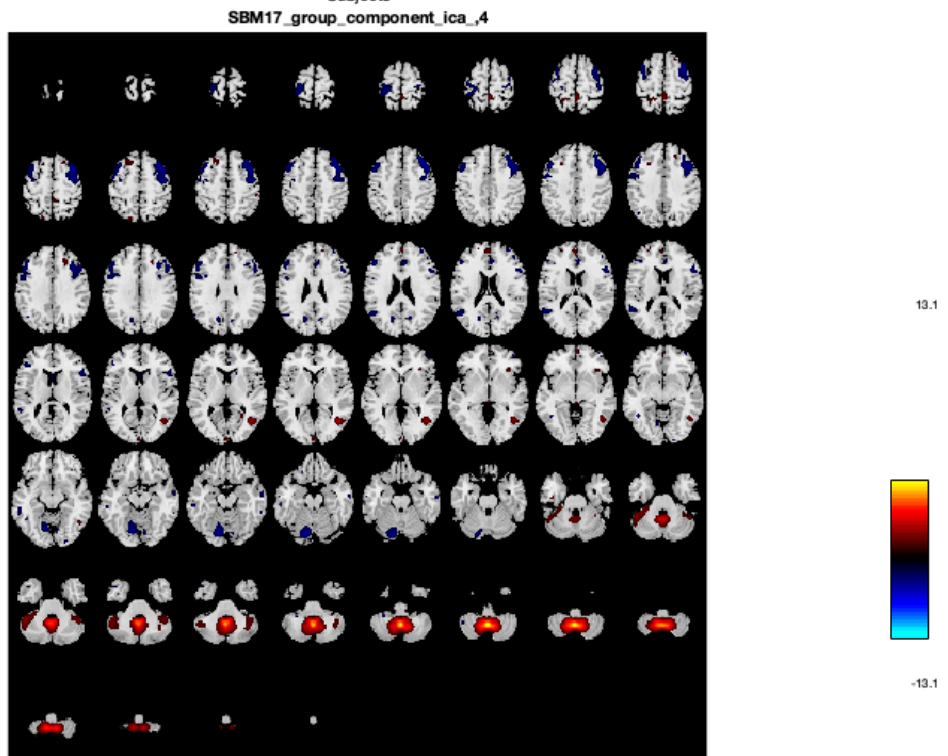

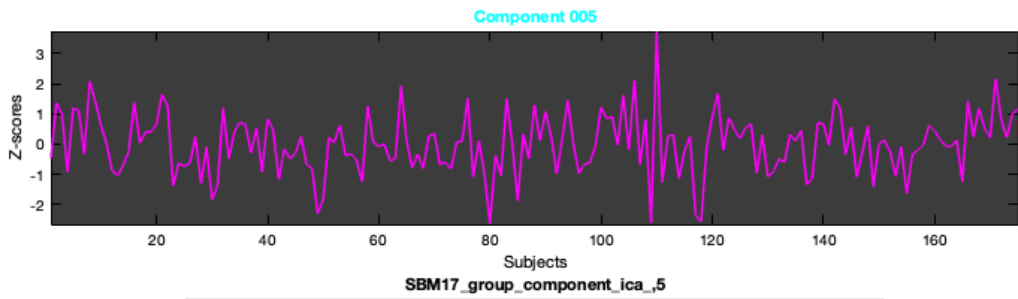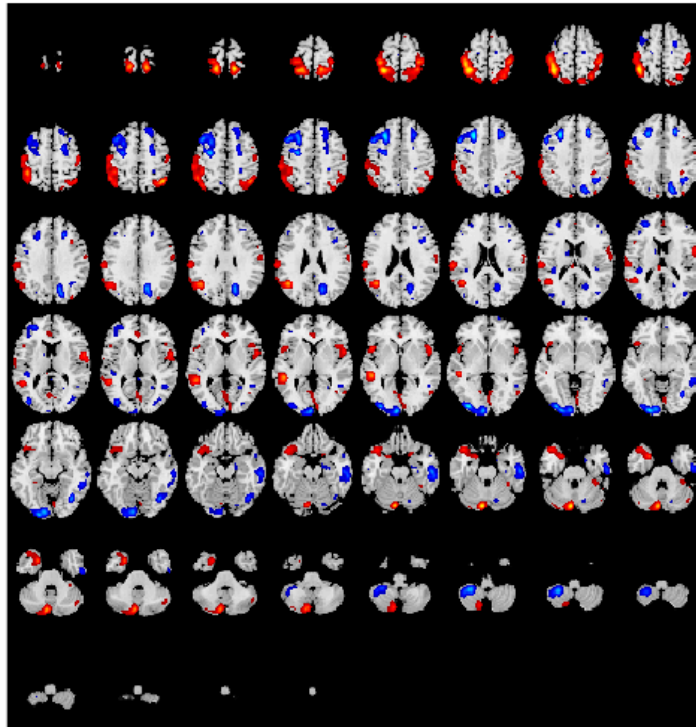

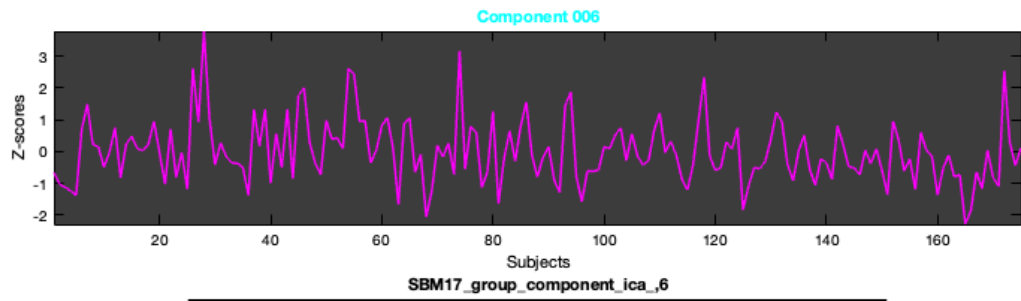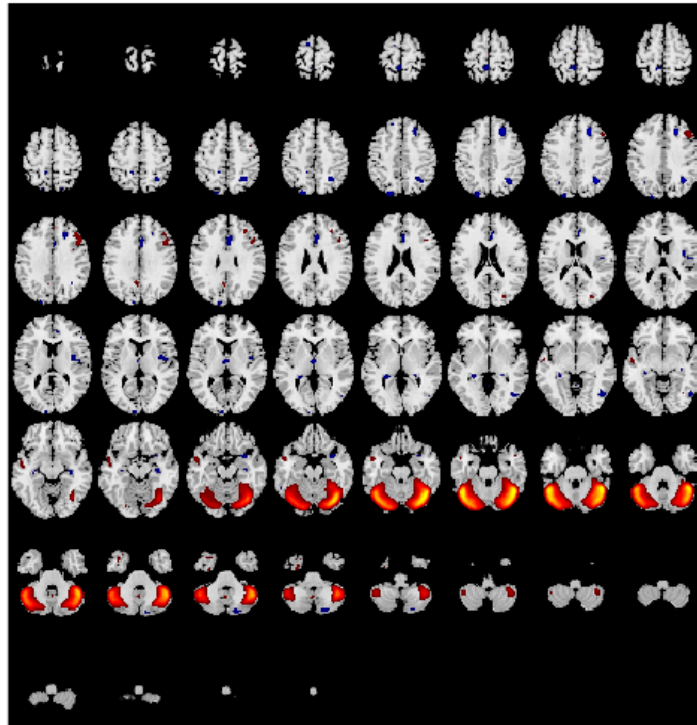

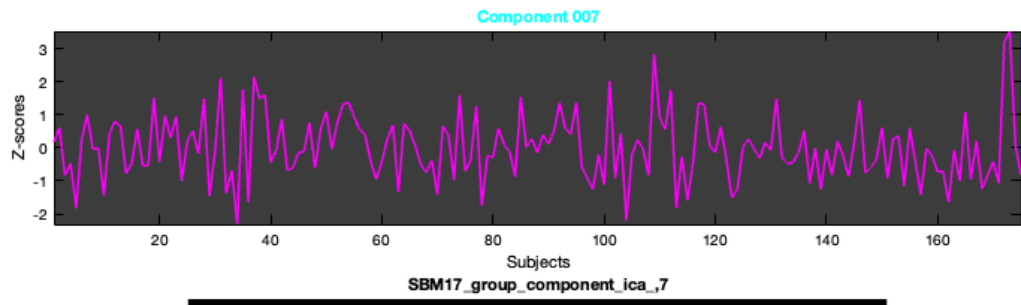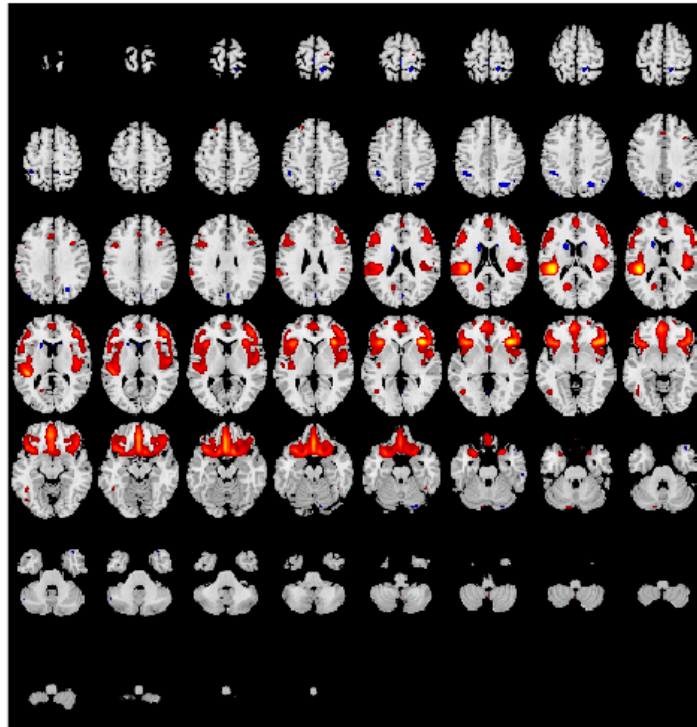

5.7

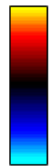

-5.7



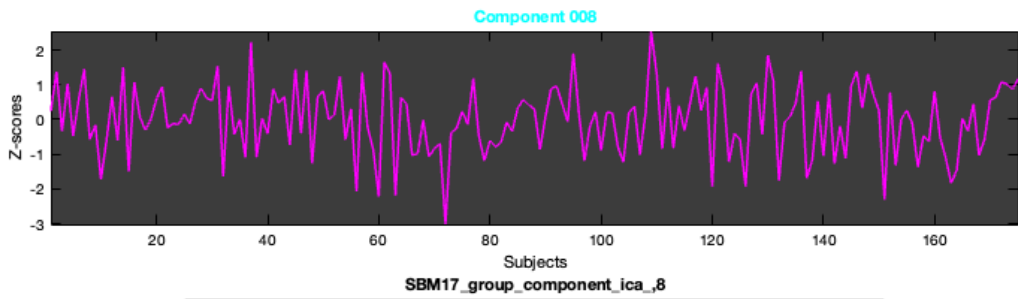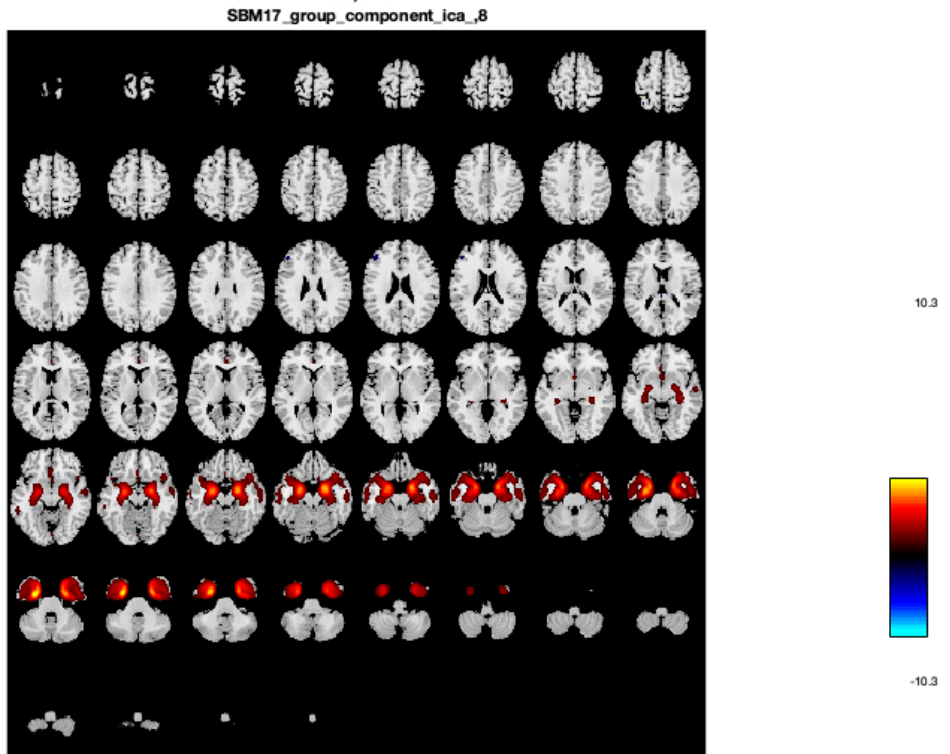

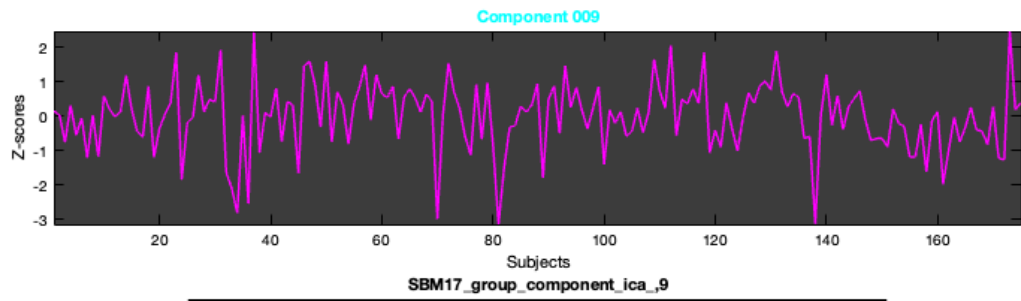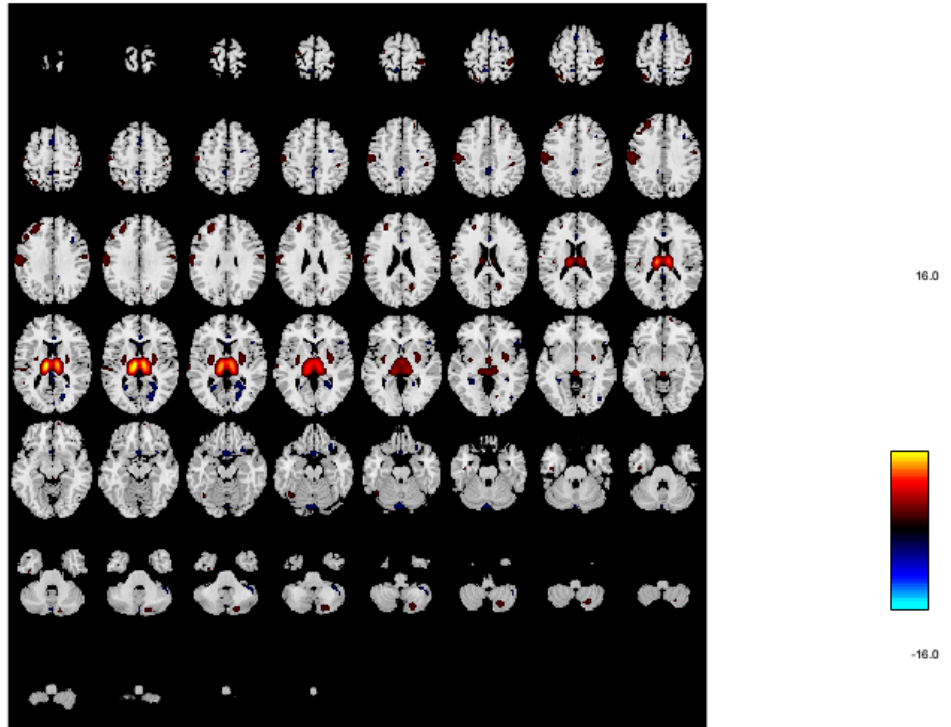

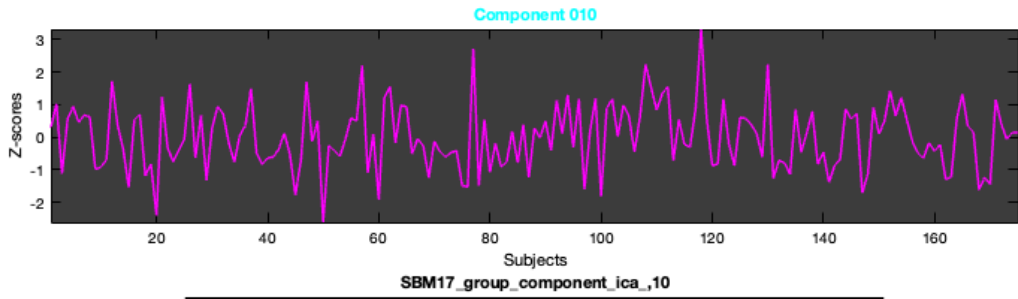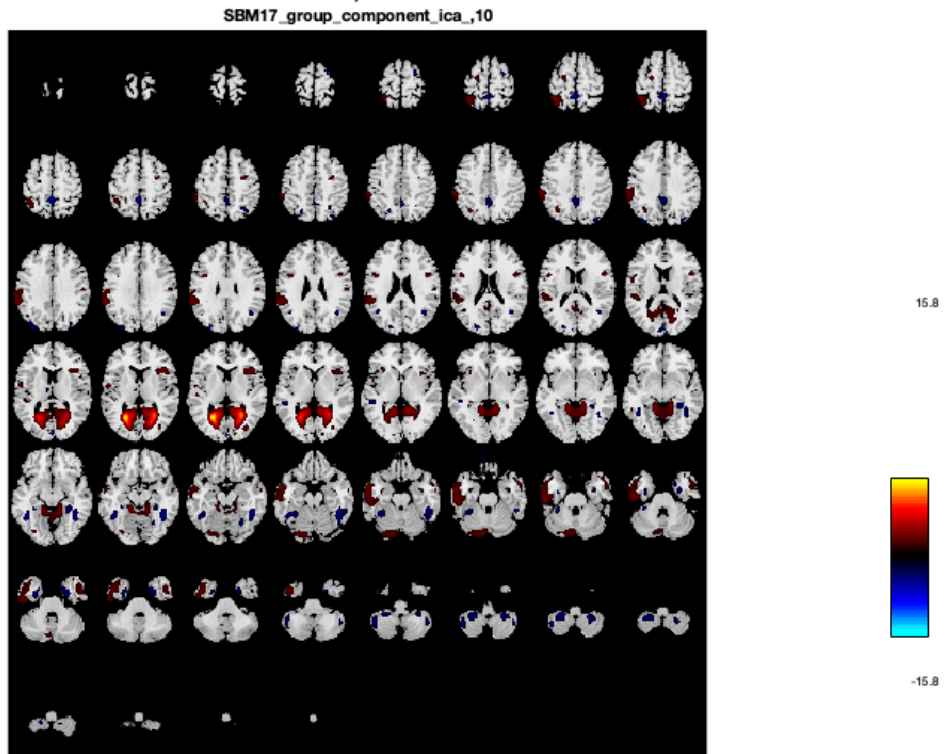

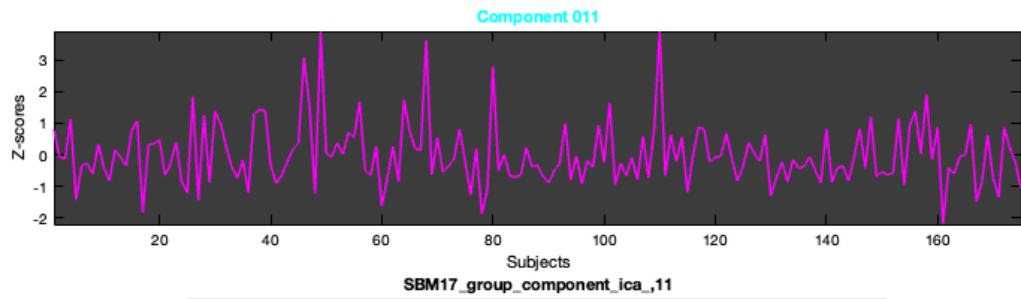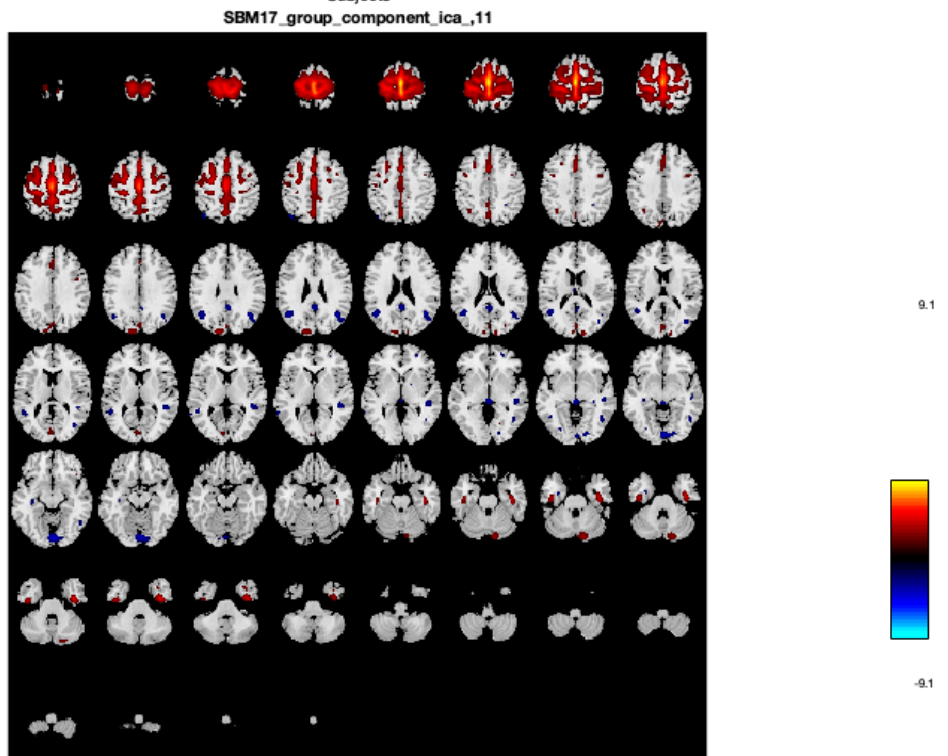

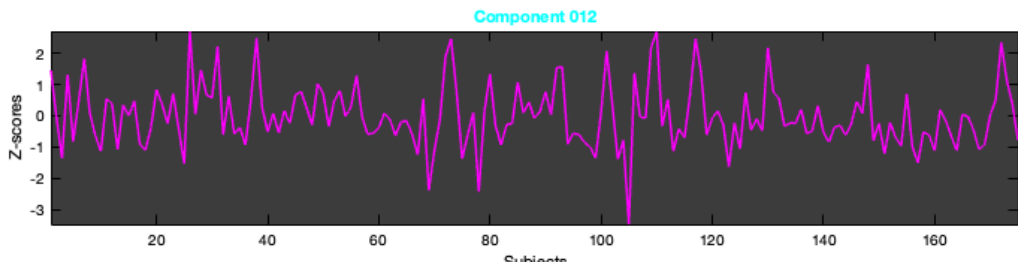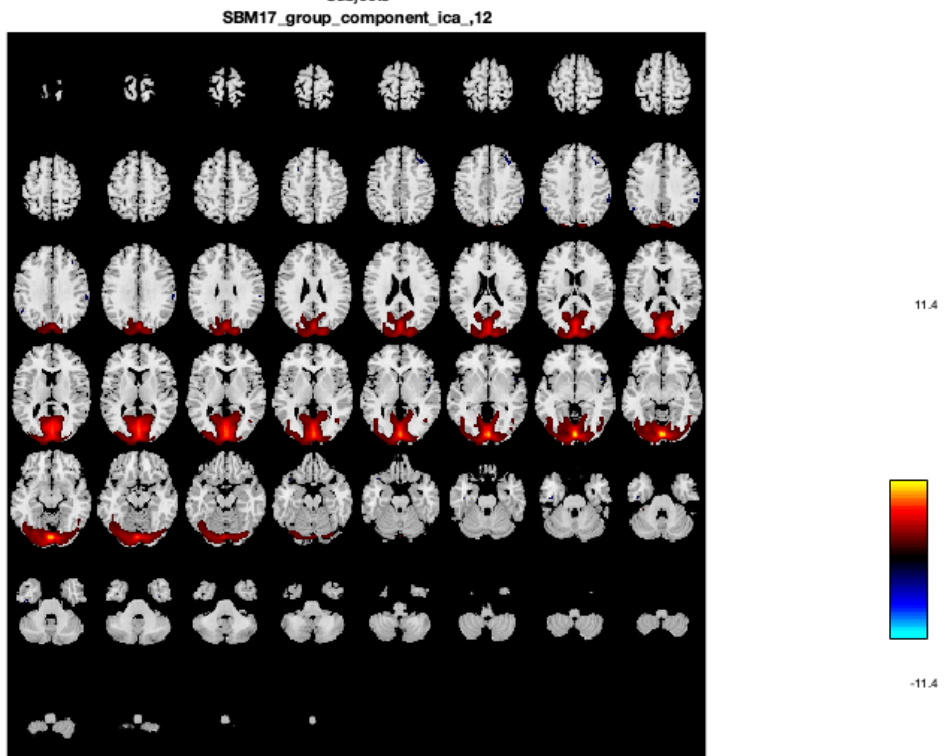

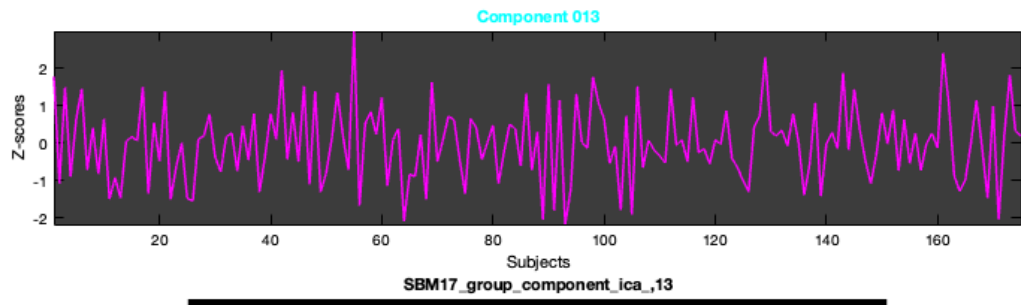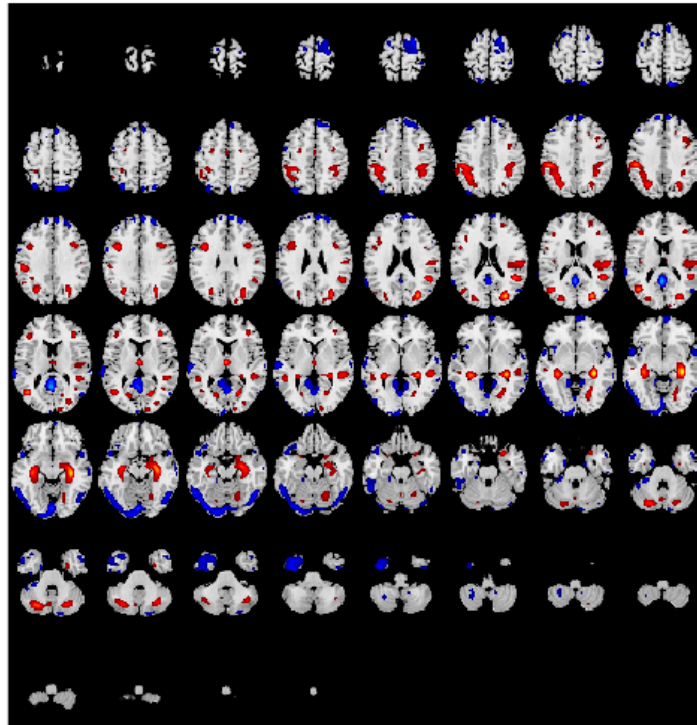

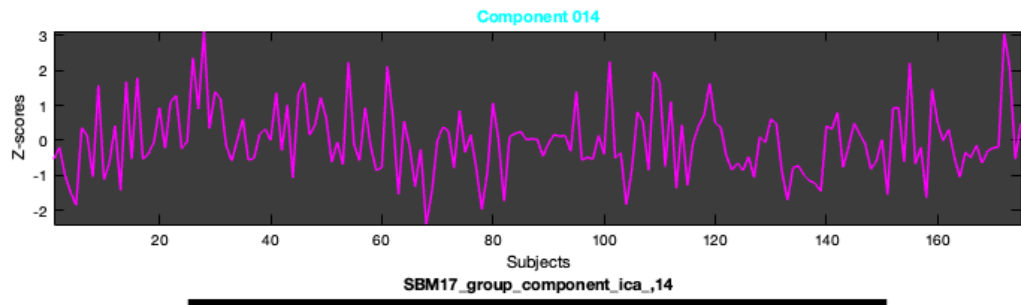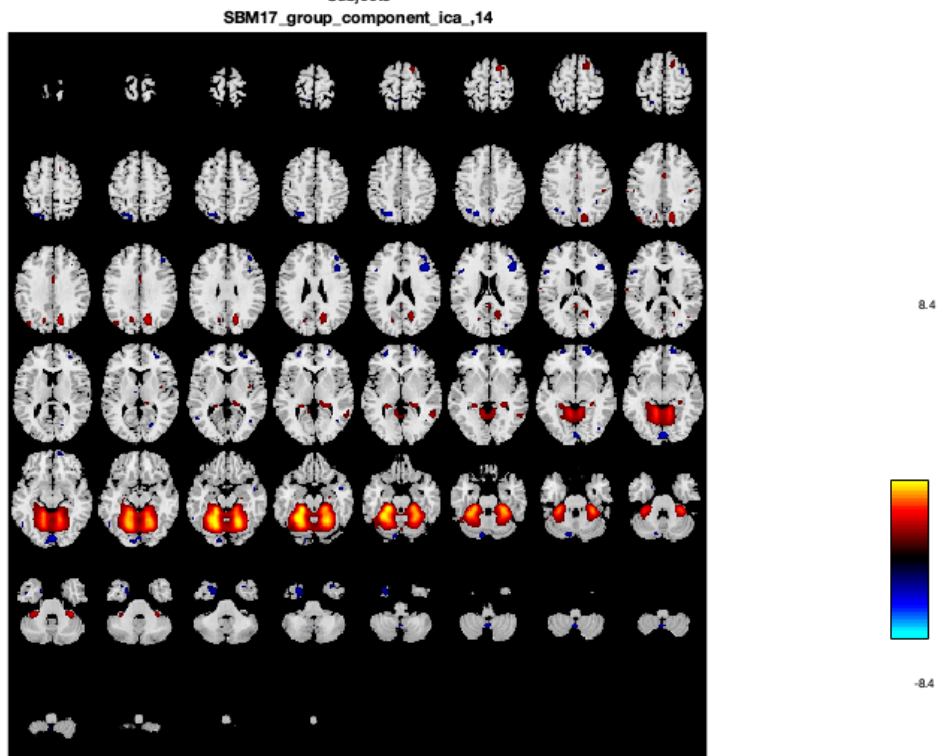

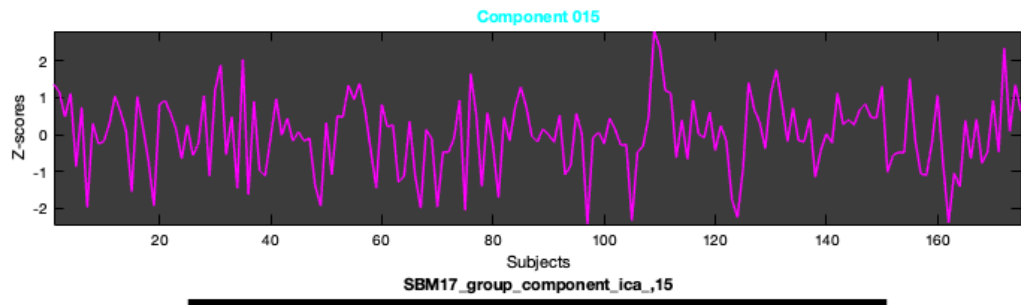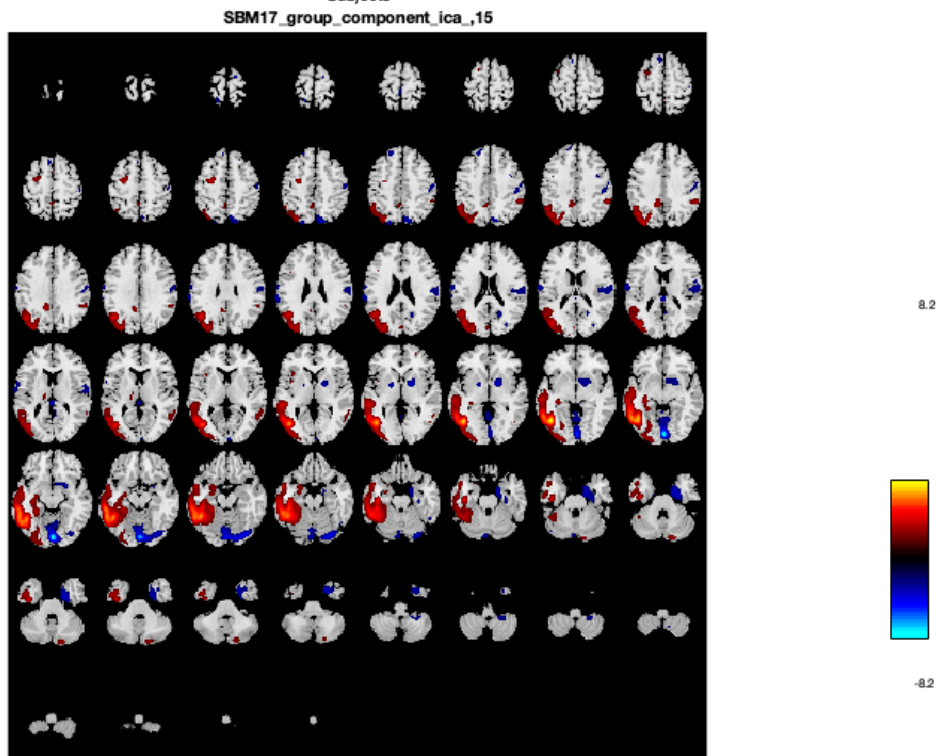



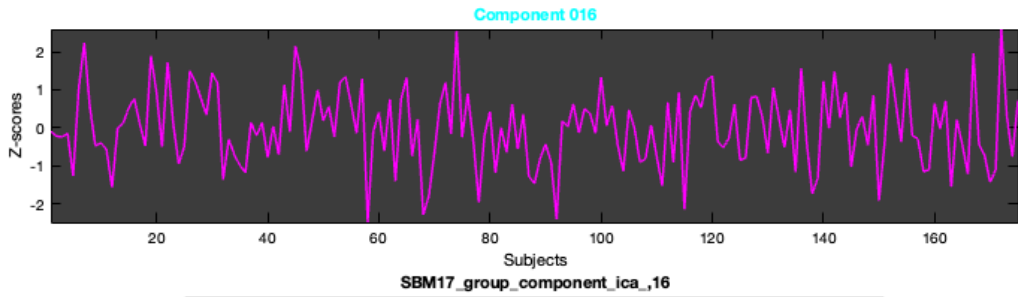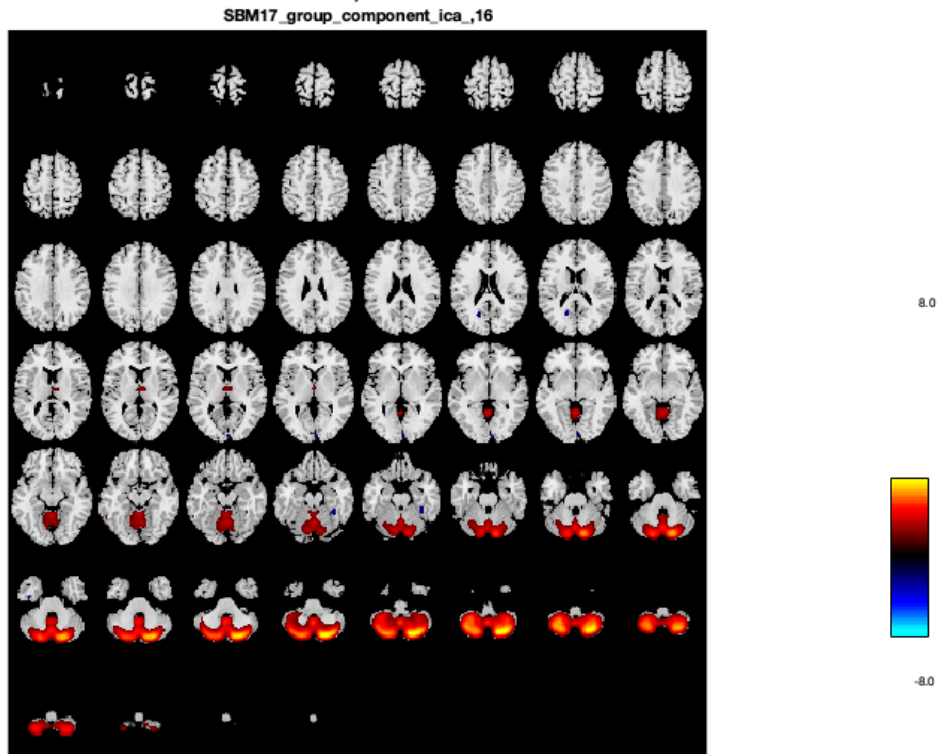

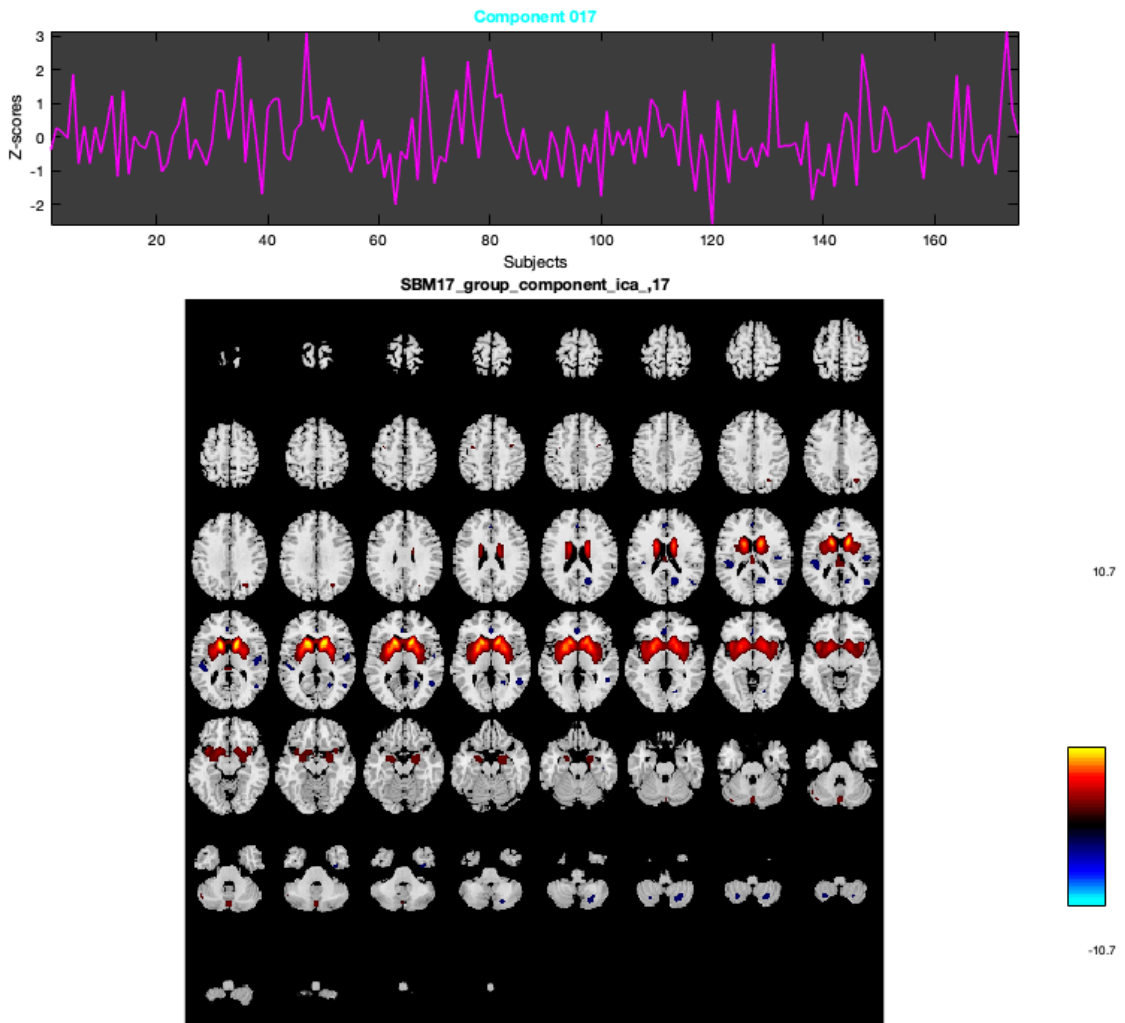

## PCA components variance summary

- **Percent variance** - Percent variance is reported for each component.

| <i>ComponentNumber</i> | <i>PercentVariance</i> |
|------------------------|------------------------|
| 1                      | 0.075218               |
| 2                      | 0.075913               |
| 3                      | 0.078431               |
| 4                      | 0.081044               |
| 5                      | 0.084658               |
| 6                      | 0.08698                |
| 7                      | 0.094783               |

---

|    |          |
|----|----------|
| 8  | 0.099173 |
| 9  | 0.11207  |
| 10 | 0.12076  |
| 11 | 0.13245  |
| 12 | 0.1721   |
| 13 | 0.20042  |
| 14 | 0.21769  |
| 15 | 0.33524  |
| 16 | 0.42956  |
| 17 | 94.211   |

## ICA components variance summary

- **Percent variance** - Percent variance is reported for each component.

| <i>ComponentNumber</i> | <i>PercentVariance</i> |
|------------------------|------------------------|
| _____                  | _____                  |
| 1                      | 5.4728                 |
| 2                      | 4.8722                 |
| 3                      | 7.5466                 |
| 4                      | -0.22871               |
| 5                      | 0.12599                |
| 6                      | 5.5897                 |
| 7                      | 14.903                 |
| 8                      | 6.672                  |
| 9                      | 2.7414                 |
| 10                     | 0.74298                |
| 11                     | 2.0388                 |
| 12                     | 5.0632                 |
| 13                     | 0.31025                |
| 14                     | 8.5808                 |
| 15                     | 1.6487                 |
| 16                     | 10.155                 |
| 17                     | 3.4598                 |

## Kurtosis of loading coefficients and spatial maps

| <i>ComponentNumber</i> | <i>Timecourses</i> | <i>SpatialMaps</i> |
|------------------------|--------------------|--------------------|
| _____                  | _____              | _____              |
| 1                      | 2.7773             | 13.422             |
| 2                      | 4.4152             | 7.5375             |
| 3                      | 3.1827             | 8.759              |
| 4                      | 3.6941             | 25.341             |
| 5                      | 3.7417             | 5.7856             |
| 6                      | 4.1823             | 18.611             |
| 7                      | 3.6743             | 5.6964             |

---

|    |        |        |
|----|--------|--------|
| 8  | 2.7953 | 22.143 |
| 9  | 3.9902 | 48.646 |
| 10 | 3.1202 | 25.61  |
| 11 | 5.7615 | 11.538 |
| 12 | 3.9441 | 18.698 |
| 13 | 2.7457 | 5.6917 |
| 14 | 3.3774 | 18.398 |
| 15 | 3.0209 | 9.5933 |
| 16 | 2.8211 | 18.479 |
| 17 | 3.7604 | 25.302 |

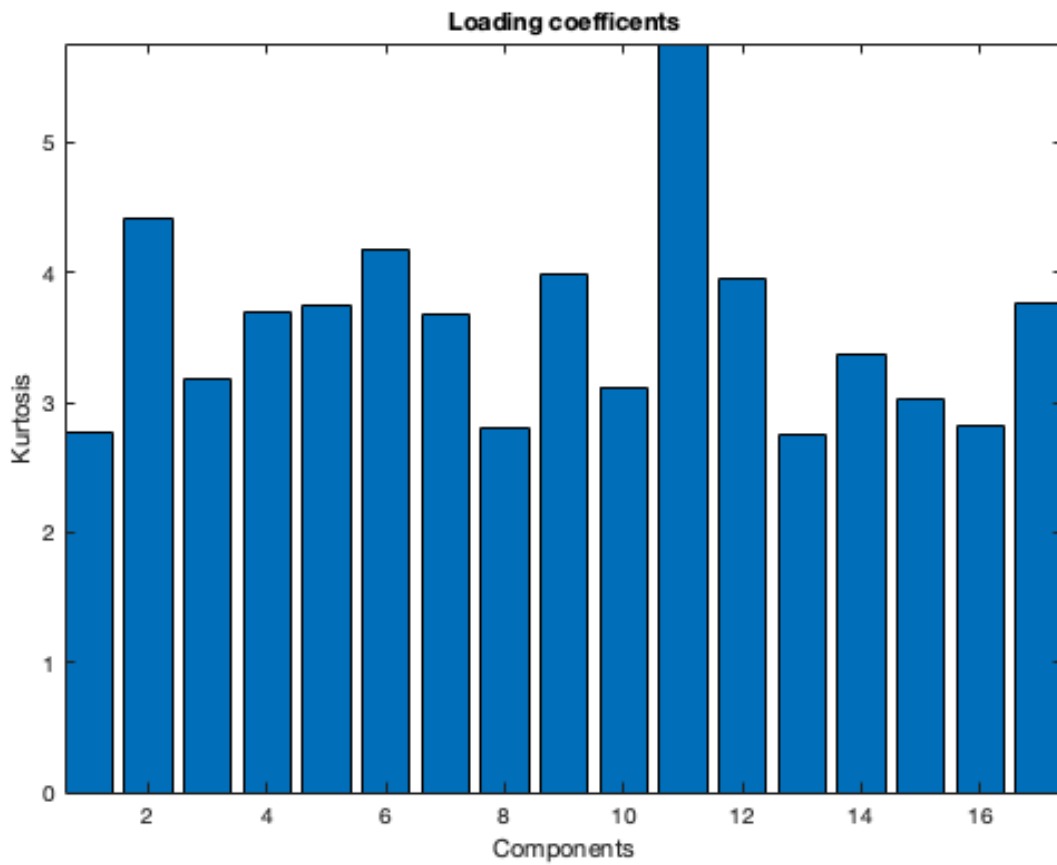

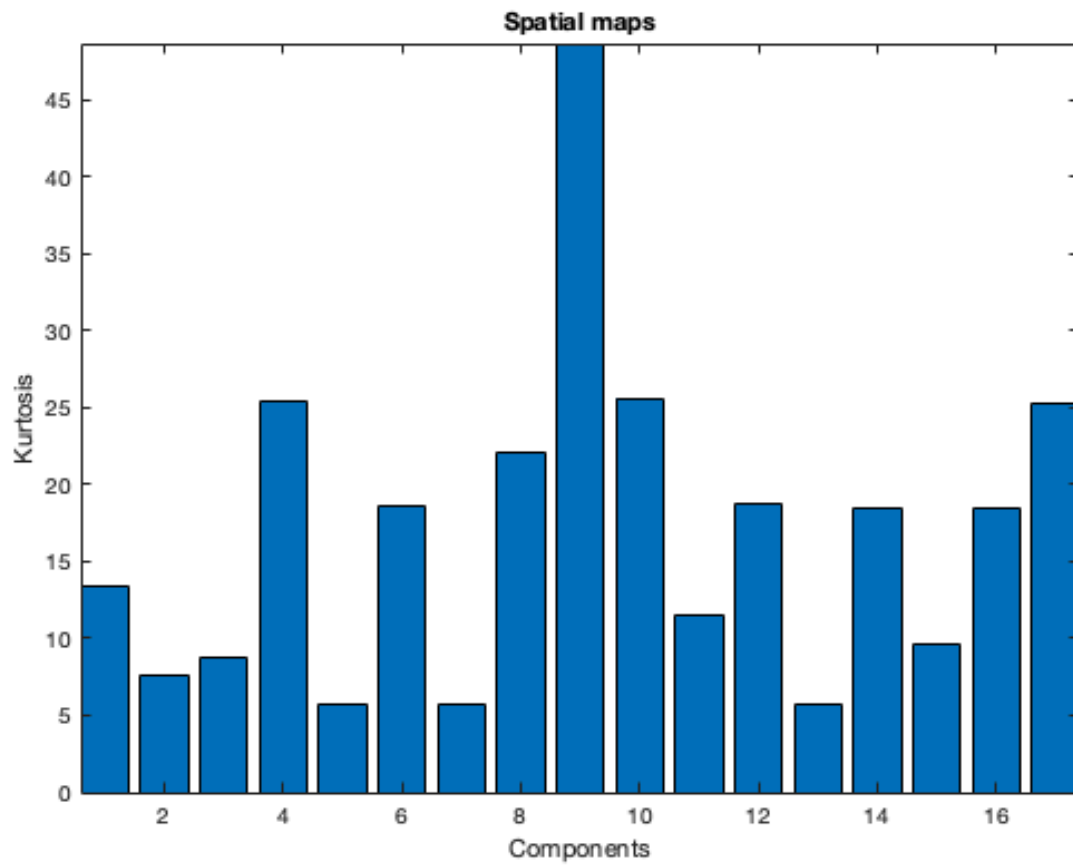

## FNC correlations of subject loadings

Functional network connectivity correlations

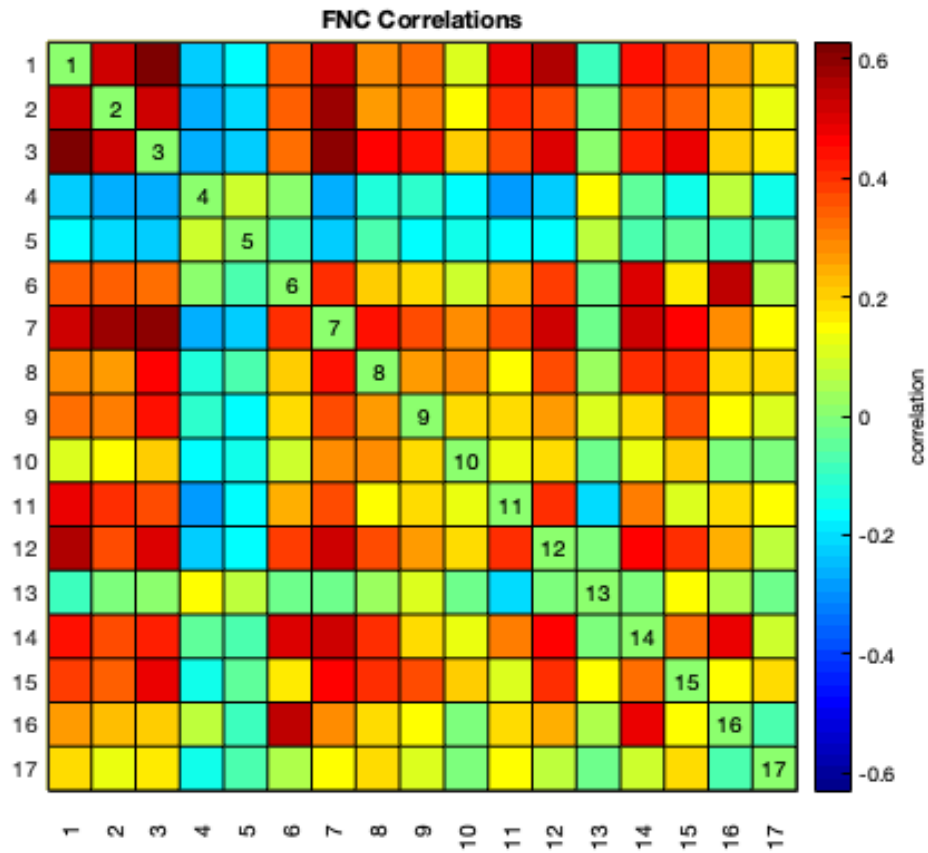

## FNC metrics of component spatial maps

Mutual information is computed between components spatially

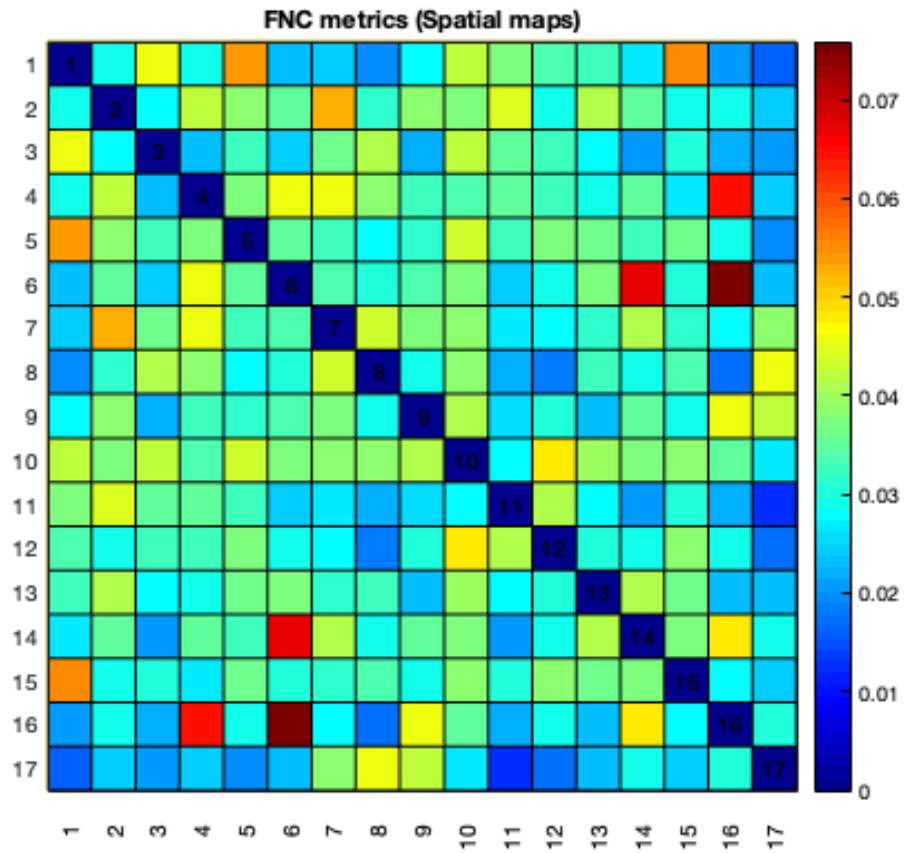

*Published with MATLAB® R2023a*
